# Supplementary material for: Salicylate and Procyanidin-Rich Stem Extracts of Gaultheria procumbens L. Inhibit Pro-Inflammatory Enzymes and Suppress Pro-Inflammatory and Pro-Oxidant Functions of Human Neutrophils Ex Vivo
Source: PubMed Central journal article supplement (PMC6479601; doi:10.3390/ijms20071753), 2019-04-09
Supplement: ijms-20-01753-s001.pdf [file ijms-20-01753-s001.pdf]

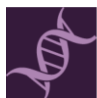

Article

# Salicylate and Procyanidin-Rich Stem Extracts of *Gaultheria procumbens* L. Inhibit Pro-Inflammatory Enzymes and Suppress Pro-Inflammatory and Pro-Oxidant Functions of Human Neutrophils *Ex Vivo*

Piotr Michel <sup>1,\*</sup>, Sebastian Granica <sup>2</sup>, Anna Magiera <sup>1</sup>, Karolina Rosińska <sup>1</sup>, Małgorzata Jurek <sup>1</sup>, Łukasz Poraj <sup>1</sup>, and Monika Anna Olszewska <sup>1</sup>

<sup>1</sup> Department of Pharmacognosy, Faculty of Pharmacy, Medical University of Lodz, Muszynskiego 1 St., 90-151 Lodz, Poland; E-Mail: anna.magiera@umed.lodz.pl (A.M.); karolinaa.rosinskaa@gmail.com (K.R.); gosiaju11@gmail.com (M.J.); lukasz.poraj@gmail.com (Ł.P.); monika.olszewska@umed.lodz.pl (M.A.O.)

<sup>2</sup> Department of Pharmacognosy and Molecular Basis of Phytotherapy, Faculty of Pharmacy, Warsaw Medical University, 1 Banacha St., Warsaw 02-097, Poland; sgranica@wum.edu.pl (S.G.)

\* Correspondence: piotr.michel@umed.lodz.pl (P.M.)

## Supplementary Materials

**Table S1.** Phenolic analytes detected in *G. procumbens* stem dry extracts by UHPLC-PDA-ESI-MS<sup>3</sup>.

**Table S2.** Correlation (*r*) coefficients and probability (*p*) values of linear relationships between antioxidant and anti-inflammatory activity parameters and phenolic contents of *G. procumbens* stem dry extracts.

**Table S3.** Antioxidant activity of *G. procumbens* stem dry extracts expressed in phenolic units.

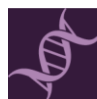

**Table S1.** Phenolic analytes detected in *G. procumbens* stem dry extracts by UHPLC-PDA-ESI-MS<sup>3</sup>.

| Peak | Analyte                                                   | Rt (min) | UV $\lambda_{\max}$ (nm) | [M-H] <sup>-</sup> m/z | MS <sup>2</sup> (% relative abundance)                                       | MS <sup>3</sup> (% relative abundance)                     | Extract         |
|------|-----------------------------------------------------------|----------|--------------------------|------------------------|------------------------------------------------------------------------------|------------------------------------------------------------|-----------------|
| 1    | protocatechuic acid hexoside                              | 3.9      | 259, 293                 | 315                    | 225 (15); 153 (100); 107 (15)                                                |                                                            | AE, ME, BE, WE  |
| 2    | protocatechuic acid *                                     | 4.2      | 259, 293                 | 153                    |                                                                              |                                                            | All             |
| 3    | caffeic acid derivative                                   | 4.7      | 325                      | 305                    | 219 (100); 179 (73); 125 (15)                                                |                                                            | All             |
| 4    | 3-O-caffeoylquinic acid (neochlorogenic acid) *           | 6.0      | 325                      | 353                    | 191 (100); 179 (55)                                                          |                                                            | AE, ME, BE, WE  |
| 5    | 3-O-p-coumaroylquinic acid derivative                     | 6.5      | 310                      | 371                    | 353 (22); 325 (63); 281 (12); 163 (100)                                      |                                                            | All             |
| 6    | procyanidin A-type dimer                                  | 9.5      | 280                      | 575                    | 499 (100); 451 (17); 407 (22); 289 (23)                                      |                                                            | All             |
| 7    | procyanidin B-type dimer                                  | 10.1     | 280                      | 577                    | <b>425 (100)</b> ; 407 (57); 289 (19)                                        | 407 (100); 273 (2)                                         | AE, ME, BE, EAE |
| 8    | procyanidin B-type dimer                                  | 10.5     | 280                      | 577                    | <b>425 (100)</b> ; 407 (56); 289 (18)                                        | 407 (100); 273 (6)                                         | All             |
| 9    | 5-O-caffeoylquinic acid (chlorogenic acid, <b>CHA</b> ) * | 10.9     | 325                      | 353                    | 191 (100); 179 (5)                                                           |                                                            | All             |
| 10   | (+)-catechin *                                            | 11.1     | 280                      | 289                    | 245 (100); 205 (40)                                                          |                                                            | All             |
| 11   | unknown compound                                          | 11.9     | 296                      | 385                    | 357 (6); 287 (5); 223 (100)                                                  |                                                            | All             |
| 12   | methyl salicylate derivative                              | 13.0     | 285                      | 653 <sup>a</sup>       | 607 (100); 575 (10)                                                          |                                                            | AE, ME, BE, WE  |
| 13   | procyanidin B-type dimer                                  | 14.1     | 280                      | 577                    | <b>425 (100)</b> ; 407 (59); 289 (29)                                        | 407 (100); 273 (8)                                         | AE, ME, WE      |
| 14   | procyanidin B2 ( <b>PB2</b> ) *                           | 15.3     | 280                      | 577                    | <b>425 (100)</b> ; 407 (53); 289 (14)                                        | 407 (100); 273 (7)                                         | All             |
| 15   | unknown compound                                          | 15.7     | 280                      | 461                    | 415 (100); 167 (9)                                                           |                                                            | All             |
| 16   | protocatechuic acid derivative                            | 16.1     | 259, 293                 | 481                    | 463 (7); 345 (72); 327 (100); 165 (28); 153 (62)                             |                                                            | All             |
| 17   | (-)-epicatechin ( <b>ECA</b> ) *                          | 16.8     | 280                      | 289                    | 245 (100); 205 (24)                                                          |                                                            | All             |
| 18   | gaultherin ( <b>GT</b> ) *                                | 17.7     | 285                      | 491 <sup>a</sup>       | 445 (15); 413 (3); 293 (72); 233 (3); 149 (5)                                |                                                            | All             |
| 19   | procyanidin A-type trimer                                 | 18.3     | 280                      | 863                    | <b>711 (100)</b> ; 573 (19); 559 (15); 451 (30); 411 (34); 289 (13)          | 693 (76); 559 (69); 541 (24); 407 (12)                     | All             |
| 20   | procyanidin B-type dimer                                  | 18.7     | 280                      | 577                    | <b>425 (100)</b> ; 407 (40); 289 (52)                                        | 407 (100); 273 (10)                                        | All             |
| 21   | procyanidin A-type dimer                                  | 19.5     | 280                      | 575                    | 499 (20); 491 (22); 451 (25); <b>425 (100)</b> ; 407 (96); 289 (36)          | 407 (100); 273 (6)                                         | AE, ME, BE, EAE |
| 22   | procyanidin A-type trimer ( <b>PAT</b> )                  | 20.3     | 280                      | 863                    | <b>711 (100)</b> ; 693 (14); 573 (25); 559 (16); 451 (23); 411 (24); 289 (7) | 693 (64); 559 (100); 541 (27); 463 (10); 407 (16); 285 (4) | All             |

Table S1. Cont.

| Peak | Analyte                                                                   | Rt (min) | UV $\lambda_{\max}$ (nm) | [M-H] <sup>-</sup> m/z | MS <sup>2</sup> (% relative abundance)                                       | MS <sup>3</sup> (% relative abundance)            | Extract         |
|------|---------------------------------------------------------------------------|----------|--------------------------|------------------------|------------------------------------------------------------------------------|---------------------------------------------------|-----------------|
| 23   | procyanidin B-type trimer                                                 | 21.3     | 280                      | 865                    | 847 (25); 739 (73); <b>713 (41)</b> ; 695 (77); 577 (98); 451 (21); 287 (17) | 695 (100); 575 (22); 561 (23); 407 (22); 243 (13) | All             |
| 24   | procyanidin B-type dimer                                                  | 22.1     | 280                      | 577                    | <b>425 (100)</b> ; 407 (44); 289 (22)                                        | 407 (100); 273 (11)                               | All             |
| 25   | procyanidin A-type dimer                                                  | 22.6     | 280                      | 575                    | 499 (69); 491 (24); 451 (22); <b>425 (100)</b> ; 407 (79); 289 (25)          | 407 (100); 273 (9)                                | All             |
| 26   | lyoniresinol hexoside                                                     | 22.8     | 280                      | 581                    | 565 (16); <b>419 (100)</b> ; 401 (12); 373 (15)                              | 404 (100); 373 (16)                               | All             |
| 27   | procyanidin B-type trimer                                                 | 23.6     | 280                      | 865                    | 847 (21); 739 (47); <b>713 (51)</b> ; 695 (92); 577 (99); 451 (52); 287 (54) | 695 (100); 575 (24); 561 (26); 407 (25); 243 (10) | All             |
| 28   | procyanidin B-type dimer                                                  | 25.0     | 280                      | 577                    | <b>425 (100)</b> ; 407 (19); 287 (51)                                        | 407 (100); 273 (17)                               | AE, ME, WE      |
| 29   | unknown compound                                                          | 25.1     | 278                      | 597                    | 577 (10); <b>553 (100)</b>                                                   | 536 (2); 419 (100); 389 (24); 233 (13)            | All             |
| 30   | unknown compound                                                          | 25.8     | 278                      | 567                    | <b>521 (100)</b>                                                             | 359 (100); 344 (96); 329 (28)                     | AE, ME, BE      |
| 31   | procyanidin A-type dimer                                                  | 26.5     | 280                      | 575                    | 499 (27); 451 (22); <b>425 (100)</b> ; 411 (57); 289 (7)                     | 407 (100); 273 (7)                                | AE, ME, BE, WE  |
| 32   | procyanidin B-type trimer                                                 | 27.1     | 280                      | 865                    | 577 (82); 407 (26); 289 (18)                                                 |                                                   | AE, ME, BE, WE  |
| 33   | quercetin 3-O- $\beta$ -D-galactopyranoside (hyperoside, <b>HY</b> ) *    | 27.6     | 254, 353                 | 463                    | <b>301 (100)</b>                                                             | 273 (38); 255 (20); 179 (100); 151 (64)           | All             |
| 34   | quercetin 3-O- $\beta$ -D-glucopyranoside (isoquercitrin, <b>IQ</b> ) *   | 28.6     | 256, 353                 | 463                    | <b>301 (100)</b>                                                             | 273 (54); 255 (22); 179 (100); 151 (76)           | All             |
| 35   | quercetin 3-O- $\beta$ -D-glucuronopyranoside (miquelianin, <b>MQ</b> ) * | 29.1     | 256, 356                 | 477                    | <b>301 (100)</b>                                                             | 273 (29); 257 (19); 179 (100); 151 (58)           | All             |
| 36   | procyanidin A-type dimer                                                  | 29.5     | 280                      | 575                    | 449 (41); <b>423 (100)</b> ; 289 (19)                                        | 405 (8); 285 (100); 257 (5)                       | All             |
| 37   | quercetin 3-O- $\alpha$ -L-arabinopyranoside (guajaverin, <b>GV</b> ) *   | 30.8     | 258, 356                 | 433                    | <b>301 (100)</b>                                                             | 273 (44); 255 (21); 179 (100); 151 (68)           | AE, ME, BE, EAE |
| 38   | unknown compound                                                          | 31.9     | 278                      | 567                    | 521 (100); 179 (33)                                                          |                                                   | All             |
| 39   | quercetin ( <b>QU</b> ) *                                                 | 43.7     | 255, 364                 | 301                    | 273 (36); 255 (21); 179 (100); 151 (69)                                      |                                                   | All             |
| 40   | kaempferol ( <b>KA</b> ) *                                                | 50.4     | 265, 364                 | 285                    | 267 (45); 257 (100); 229 (80); 163 (15); 151 (18)                            |                                                   | AE, BE, EAE     |

Rt, retention times. UV  $\lambda_{\max}$ , absorbance maxima in PDA spectra. [M-H]<sup>-</sup>, pseudomolecular ions in MS spectra recorded in a negative ion mode. In bold – ions subjected to MS<sup>3</sup> fragmentation. Compounds marked with an asterisk (\*) were identified with authentic standards. <sup>a</sup> [M+HCOO]<sup>-</sup>.



**Table S2.** Correlation (*r*) coefficients and probability (*p*) values of linear relationships between antioxidant and anti-inflammatory activity parameters and phenolic contents of *G. procumbens* stem dry extracts.

| <i>r</i> ( <i>p</i> ) for: | Antioxidant activity |                  |                 |                              |                 | Anti-inflammatory activity    |                 |                 |                   |
|----------------------------|----------------------|------------------|-----------------|------------------------------|-----------------|-------------------------------|-----------------|-----------------|-------------------|
|                            | DPPH                 | FRAP             | TBARS           | O <sub>2</sub> <sup>•-</sup> | •OH             | H <sub>2</sub> O <sub>2</sub> | HYAL            | LOX             | COX-2             |
| TPC                        | -0.9523 (0.048) *    | 0.8857 (0.114)   | -0.7312 (0.269) | 0.1236 (0.876)               | 0.2291 (0.771)  | -0.9127 (0.087)               | -0.6998 (0.300) | -0.4797 (0.520) | -0.9729 (0.027) * |
| TPH                        | -0.9171 (0.083)      | 0.9773 (0.023) * | -0.8302 (0.170) | -0.2958 (0.704)              | -0.1750 (0.825) | -0.8491 (0.151)               | -0.7303 (0.270) | -0.7638 (0.236) | -0.8661 (0.134)   |
| TPA                        | -0.3806 (0.619)      | 0.3443 (0.656)   | -0.7292 (0.271) | -0.3806 (0.619)              | -0.8987 (0.101) | -0.3804 (0.620)               | -0.6502 (0.350) | -0.9257 (0.074) | -0.2147 (0.785)   |
| TLPA                       | -0.7476 (0.252)      | 0.8691 (0.131)   | -0.8364 (0.164) | -0.6647 (0.335)              | -0.5705 (0.429) | -0.6772 (0.323)               | -0.7005 (0.299) | -0.9448 (0.055) | -0.6300 (0.370)   |
| TPHA                       | -0.6748 (0.325)      | 0.9158 (0.084)   | -0.6978 (0.302) | -0.6378 (0.362)              | -0.4982 (0.502) | -0.5740 (0.426)               | -0.5322 (0.468) | -0.8490 (0.151) | -0.5703 (0.430)   |
| TSAL                       | -0.9161 (0.084)      | 0.9419 (0.058)   | -0.6902 (0.310) | 0.0383 (0.962)               | 0.1726 (0.827)  | -0.8533 (0.147)               | -0.6265 (0.374) | -0.5029 (0.497) | -0.9266 (0.073)   |
| TFL                        | 0.1608 (0.839)       | -0.5707 (0.429)  | -0.1858 (0.814) | -0.1645 (0.836)              | -0.3802 (0.620) | 0.0308 (0.969)                | -0.3085 (0.691) | -0.1445 (0.855) | 0.2200 (0.780)    |

Activity and concentration parameters according to Figs. 2 and 3. Asterisk mean significance of the estimated linear relationship (\* *p* < 0.05) for four extracts (data points *n* = 4).



**Table S3.** Antioxidant activity of *G. procumbens* stem dry extracts expressed in phenolic units.

| Analyte | DPPH                                          | FRAP                                         | TBARS                                        | O <sub>2</sub> <sup>•-</sup>                 | •OH                                          | H <sub>2</sub> O <sub>2</sub>                |
|---------|-----------------------------------------------|----------------------------------------------|----------------------------------------------|----------------------------------------------|----------------------------------------------|----------------------------------------------|
|         | SC <sub>50</sub><br>(µg GAE /mL) <sup>a</sup> | mmol Fe <sup>2+</sup> /g<br>GAE <sup>b</sup> | IC <sub>50</sub><br>(µg GAE/mL) <sup>c</sup> | SC <sub>50</sub><br>(µg GAE/mL) <sup>a</sup> | SC <sub>50</sub><br>(µg GAE/mL) <sup>a</sup> | SC <sub>50</sub><br>(µg GAE/mL) <sup>a</sup> |
| AE      | 1.97                                          | 21.99                                        | 2.33                                         | 7.80                                         | 51.90                                        | 11.48                                        |
| ME      | 1.94                                          | 19.94                                        | 2.16                                         | 8.00                                         | 41.06                                        | 10.49                                        |
| BE      | 2.18                                          | 19.45                                        | 3.99                                         | 11.37                                        | 58.99                                        | 12.62                                        |
| WE      | 2.14                                          | 22.68                                        | 3.72                                         | 6.12                                         | 36.92                                        | 13.55                                        |

<sup>a</sup> Scavenging efficiency (amount of antioxidant needed to decrease the initial concentration of the oxidant by 50%) expressed in µg of phenolics/mL of the DPPH solution (values obtained by converting the original SC<sub>50</sub> values using the TPC levels); <sup>b</sup> values expressed per g of phenolics (obtained by converting the original FRAP values using the TPC levels); <sup>c</sup> inhibition concentration (amount of antioxidant needed to decrease linoleic acid peroxidation and formation of TBARS by 50%) expressed in µg of phenolics/mL of the substrate solution (values obtained by converting the original IC<sub>50</sub> values using the TPC levels). For original TPC, FRAP, SC<sub>50</sub> and IC<sub>50</sub> parameters see Table 1 and Fig. 2.
